# Supplementary material
Source: PubMed Central journal article supplement (PMC5297971)
Supplement: JPE-54-28-s002.pdf [file JPE-54-28-s002.pdf]

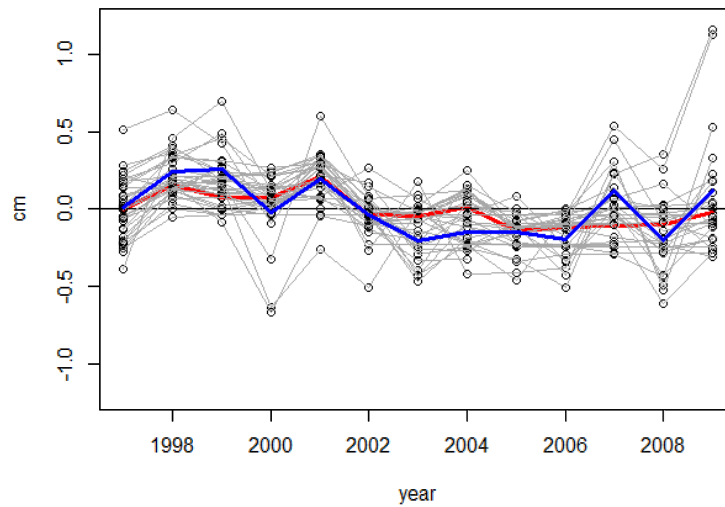

Fig. S2: Model sensitivity to interannual climate variation. To test the model's ability to correctly capture the effect of interannual climate variation at the level of individual trees, we used data from an intensive forest monitoring plot located within the Kalkalpen Nationalpark, for which the dbh of 15 trees (grey) has been monitored using automated dendrometers over a 14 year period. The figure presents a moving average over growth anomalies with a time lag of one year. red: iLand simulation, blue: observed by using automated dendrometers. Gleichläufigkeit=0.690.
