# Supplementary material
Source: PubMed Central journal article supplement (PMC5297971)
Supplement: JPE-54-28-s003.pdf [file JPE-54-28-s003.pdf]

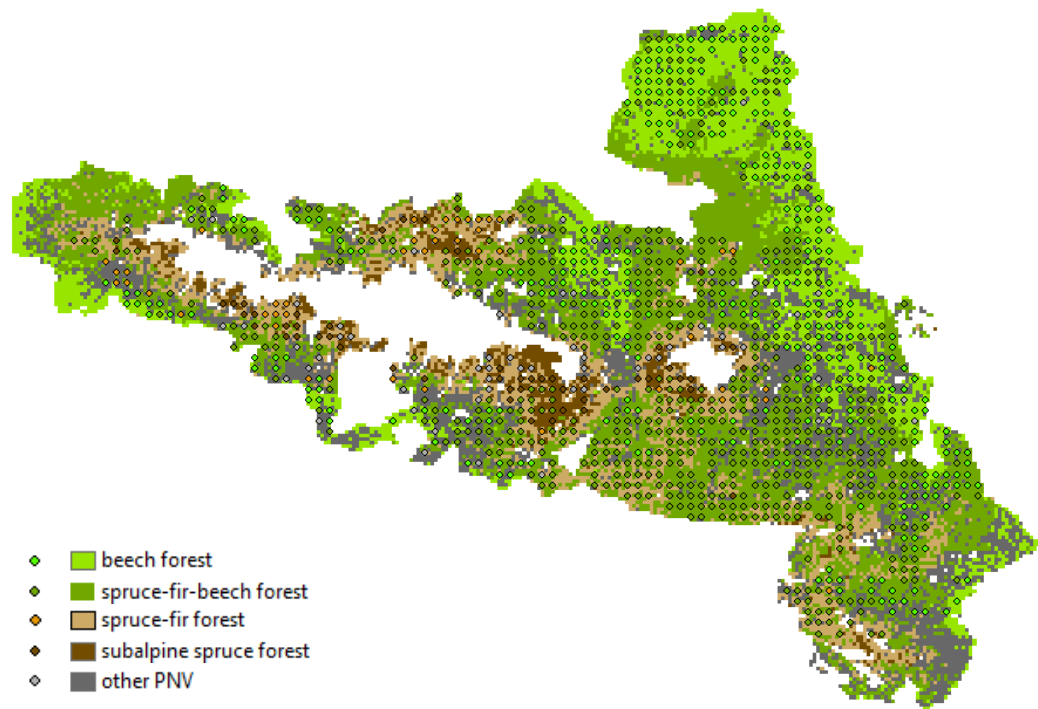

Fig. S3: Comparison between simulated potential natural vegetation (PNV, continuous map) and expectations from inventory plots (circles). For this evaluation exercise we simulated the entire landscape for 2,500 years starting from bare ground under baseline climate conditions, and compared the simulated equilibrium vegetation composition with expectations for the PNV recorded at 1,110 inventory plots.
